# Supplementary material
Source: PubMed Central journal article supplement (PMC8522770)
Supplement: aac.02288-20-s0001.pdf [file aac.02288-20-s0001.pdf]

**Figure S1: K-mer Distance Phylogenetic Tree**

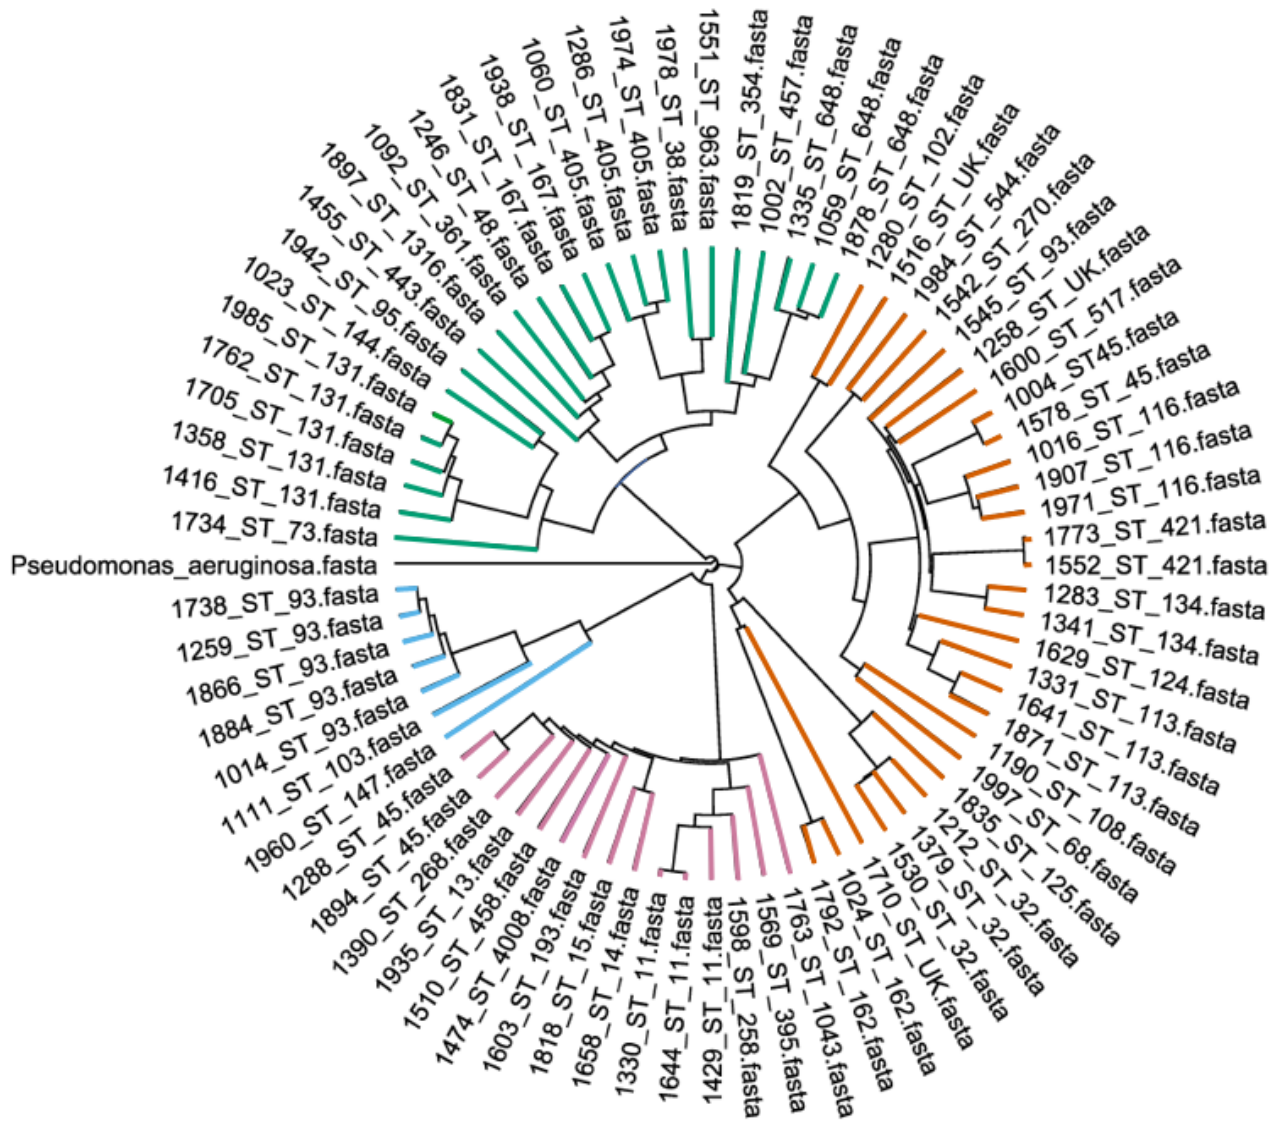

**Genus & Species**

- E. coli*
- E. cloacae* complex
- K. aerogenes*
- K. pneumoniae*

# Table S1: Isolate Characteristics, Genes Detected, and Antimicrobial Susceptibilities

| Genus & Species      | Sequence Type | I-R MIC (µg/ml) | I-R Susceptibility | mCIM Result   | Genes Detected |                   |                   |                        | Specimen Source | AST Method   | Antimicrobial Susceptibility Testing |     |     |     |     |     |    |     |     |     |     |   |   |
|----------------------|---------------|-----------------|--------------------|---------------|----------------|-------------------|-------------------|------------------------|-----------------|--------------|--------------------------------------|-----|-----|-----|-----|-----|----|-----|-----|-----|-----|---|---|
|                      |               |                 |                    |               | Carbapenemase  | ESBL              | Other β-lactamase | Porin Detection        |                 |              | AMP                                  | SAM | TZP | CFZ | FOX | CAZ | CR | FEP | ETP | IPM | MEM |   |   |
| <i>E. coli</i>       | 405           | >32             | R                  | Not Tested    | NDM-5          | CTX-M-15          | OXA-1; TEM-1      | Not tested             | Urine           | Vitek-2      | R                                    | R   | R   | R   |     | R   | R  | R   | R   | R   |     |   |   |
| <i>E. coli</i>       | 648           | >32             | R                  | Not Tested    | NDM-5          |                   | TEM-1             | Not tested             | Urine           | Kirby-Bauer  | R                                    |     | R   | R   |     |     | R  | R   | R   |     |     | R |   |
| <i>K. pneumoniae</i> | 11            | 16              | R                  | Not Tested    | NDM-1          | SHV-182           |                   | Not tested             | Rectal          | Kirby-Bauer  |                                      |     | S   |     |     | R   |    | R   |     |     | R   | R |   |
| <i>K. pneumoniae</i> | 14            | 16              | R                  | Not Tested    | NDM-5; OXA-181 | SHV               | OXA-9; TEM-1      | Not tested             | Urine           | Kirby-Bauer  | R                                    | R   | R   | R   |     | R   | R  | R   | R   | R   | R   | R | R |
| <i>E. cloacae</i>    | 102           | 8               | R                  | Indeterminate |                |                   | ACT-5             | Defective ompA         | Wound           | Vitek-2      |                                      |     |     | R   | R   | R   | R  | S   | R   |     |     | S |   |
| <i>E. coli</i>       | 73            | 8               | R                  | Not Tested    | NDM-5          |                   | TEM-1             | Not tested             | Blood           | Vitek-2      | R                                    | R   | R   | R   |     | R   | R  | R   | R   | R   |     | R |   |
| <i>E. coli</i>       | 1316          | 8               | R                  | Not Tested    | NDM-7          |                   | AmpC              | Not tested             | Rectal          | Vitek-2      | R                                    | R   | R   | R   | R   | R   | R  | R   |     |     |     |   | R |
| <i>K. pneumoniae</i> | 11            | 8               | R                  | Not Tested    | NDM-1          | SHV-182           | OXA-1             | Not tested             | Rectal          | Kirby-Bauer  | R                                    | R   | R   |     |     | R   | R  | R   | R   | R   | R   | R | R |
| <i>K. pneumoniae</i> | 395           | 8               | R                  | Not Tested    | NDM-1          | CTX-M-15; SHV-182 |                   | Not tested             | Urine           | Not Reported |                                      |     |     |     |     |     |    |     |     |     |     |   |   |
| <i>K. pneumoniae</i> | 1043          | 8               | R                  | Not Tested    | NDM-1          | SHV-172           |                   | Not tested             | Urine           | Walkaway     |                                      | R   | R   | R   | R   | R   | R  | R   | R   | R   | R   |   | R |
| <i>K. pneumoniae</i> | 11            | 8               | R                  | Not Tested    | NDM-7          | CTX-M-15; SHV-12  | TEM-1             | Not tested             | Urine           | Not Reported | R                                    | R   | R   | R   |     | R   | R  | R   | R   |     |     |   | R |
| <i>E. coli</i>       | 167           | 4               | R                  | Not Tested    | NDM-5          |                   | TEM-1             | Not tested             | Urine           | Walkaway     | R                                    | R   | R   | R   | R   | R   | R  | R   | R   | R   | R   | R | R |
| <i>E. coli</i>       | 167           | 4               | R                  | Not Tested    | NDM-5          | CTX-M-15          | OXA-1             | Not tested             | Rectal          | Walkaway     |                                      | R   | R   | R   | R   | R   | R  | R   | R   | R   | R   | R | R |
| <i>K. pneumoniae</i> | 45            | 4               | R                  | Negative      |                | SHV-1             | CMY-2             | Defective ompA; ompK35 | Rectal          | Not Reported | R                                    | R   | R   |     |     | R   | R  | R   | R   | R   | R   | R | R |
| <i>K. pneumoniae</i> | 13            | 2               | I                  | Negative      |                | SHV-12            | TEM-1             | Defective ompA         | Rectal          | Kirby-Bauer  | R                                    | R   | R   | R   |     | R   | R  | R   | R   | R   | R   | R | R |
| <i>E. cloacae</i>    | 113           | 1               | S                  | Negative      |                |                   | ACT-4             | None                   | Urine           | Walkaway     |                                      | R   |     | R   | R   | R   |    | R   | R   | R   | R   | R | R |
| <i>E. cloacae</i>    | 270           | 1               | S                  | Indeterminate |                |                   | ACT-16; TEM-1     | None                   | Rectal          | Walkaway     |                                      | R   | R   | R   | R   | R   | R  | I   | R   | R   | R   | R | R |
| <i>E. cloacae</i>    | 162           | 1               | S                  | Negative      |                |                   | ACT-2             | None                   | Urine           | Walkaway     |                                      | R   | S   | R   |     | I   | R  | S   | R   | R   | R   | R | R |
| <i>E. coli</i>       | 648           | 1               | S                  | Negative      |                |                   |                   | Not tested             | Urine           | Vitek-2      | I                                    | S   | R   | S   | I   | S   | S  | S   | S   |     |     |   | R |
| <i>E. coli</i>       | 48            | 1               | S                  | Negative      |                | CTX-M-15          | CMY-2             | Not tested             | Urine           | Vitek-2      | R                                    |     | R   | R   | R   | R   | R  | R   | R   | R   |     |   | S |
| <i>E. coli</i>       | 648           | 1               | S                  | Not Tested    | OXA-48         |                   | DHA-1             | Not tested             | Other           | Vitek-2      | R                                    | R   | R   | R   | R   | S   | S  | S   | S   | R   |     |   | I |
| <i>K. pneumoniae</i> | 4008          | 1               | S                  | Not Tested    |                |                   | AmpC              | Not tested             | Urine           | Not Reported | R                                    | R   | R   | R   | R   | R   | R  | R   | R   | R   | I   |   | S |

|                      |             |      |   |                   |  |          |         |                  |                 |                             |   |   |   |   |   |   |   |   |   |   |   |
|----------------------|-------------|------|---|-------------------|--|----------|---------|------------------|-----------------|-----------------------------|---|---|---|---|---|---|---|---|---|---|---|
| <i>K. pneumoniae</i> | 45          | 1    | S | Negative          |  | SHV-1    |         | None             | Rectal          | Walkaway<br>Not<br>Reported | R | R | R |   |   | R | R | R | R | R | I |
| <i>E. cloacae</i>    | 421         | 0.5  | S | Negative          |  |          | ACT-4   | Not tested       | Urine           | Reported                    | R | R |   | R |   |   | R | R | R |   | S |
| <i>E. coli</i>       | 131         | 0.5  | S | Negative          |  | CTX-M-33 | TEM-1   | None             | Urine           | Not<br>Reported             | R | R | R | R | R | R | R | R |   |   | R |
| <i>E. coli</i>       | 963         | 0.5  | S | Negative          |  |          | CMY-2   | Not tested       | Urine           | Vitek-2                     | R | R | R | R | R | R | R | S | R |   | S |
| <i>E. coli</i>       | 131         | 0.5  | S | Not<br>Tested     |  | NDM-1    |         | Not tested       | Urine           | Not<br>Reported             |   |   |   |   |   |   |   |   |   |   |   |
| <i>K. pneumoniae</i> | 258         | 0.5  | S | Not<br>Tested     |  | KPC-3    | SHV-182 | OXA-9; TEM-1     | Rectal          | Walkaway                    |   | R | R | R | R | R | R | R | R | R | R |
| <i>E. cloacae</i>    | 45          | <0.5 | S | Negative          |  |          |         | ACT-15;<br>TEM-1 | Urine           | Walkaway                    |   | R | R | R | R | R | R | S | R | S | S |
| <i>E. cloacae</i>    | 116         | <0.5 | S | Negative          |  |          |         | ACT-7; TEM-1     | Urine           | Vitek-2                     |   |   |   | R | R | R | R | S | R |   | S |
| <i>E. cloacae</i>    | 162         | <0.5 | S | Negative          |  |          |         | ACT-2            | Urine           | Vitek-2                     |   | R | R | R |   | R | R | S | R | R |   |
| <i>E. cloacae</i>    | 108         | <0.5 | S | Negative          |  |          |         | ACT              | Urine           | Vitek-2                     | R | R | R | R | R | R | R | S | R |   | S |
| <i>E. cloacae</i>    | 32          | <0.5 | S | Positive          |  |          |         | ACT-9            | Urine           | Vitek-2                     |   |   | R | R |   | R | R | S | R | I |   |
| <i>E. cloacae</i>    | Unkn<br>own | <0.5 | S | Negative          |  |          |         | ACT-7            | Wound           | Walkaway                    |   | R | R | R |   | R | R | R | R | S | R |
| <i>E. cloacae</i>    | 134         | <0.5 | S | Negative          |  |          |         | ACT-7            | Blood           | Vitek-2                     | R | R | R | R | R | R | R | S | R |   | S |
| <i>E. cloacae</i>    | 134         | <0.5 | S | Indetermi<br>nate |  |          |         | ACT-7            | Urine           | Vitek-2                     |   |   | R | R |   | R | R | S | R |   | S |
| <i>E. cloacae</i>    | 32          | <0.5 | S | Negative          |  |          |         | ACT-9            | Urine           | Reported                    | R | R | R | S |   | R | R | S | R |   | I |
| <i>E. cloacae</i>    | Unkn<br>own | <0.5 | S | Indetermi<br>nate |  |          |         | AmpC             | Urine           | Vitek-2                     |   |   | R | R | R | R | S | R |   |   | S |
| <i>E. cloacae</i>    | 32          | <0.5 | S | Positive          |  |          |         | ACT-9            | Rectal          | Walkaway                    |   | R | I | R | R | R | R | S | R | I | S |
| <i>E. cloacae</i>    | 93          | <0.5 | S | Not<br>Tested     |  |          |         | ACT-7            | Other           | Reported                    |   |   |   |   |   |   |   |   |   |   |   |
| <i>E. cloacae</i>    | 45          | <0.5 | S | Negative          |  |          |         | TEM-1            | Urine           | Walkaway                    |   | R |   | R |   | R | R | R | R | S | S |
| <i>E. cloacae</i>    | 517         | <0.5 | S | Negative          |  |          |         | ACT-7            | Respirato<br>ry | Vitek-2                     |   |   | R | R | R | R | R | S | R |   | S |
| <i>E. cloacae</i>    | 124         | <0.5 | S | Negative          |  |          |         | ACT-4            | Urine           | Vitek-2                     |   |   | R |   |   | R | R | R | R |   | S |
| <i>E. cloacae</i>    | 113         | <0.5 | S | Negative          |  |          |         | ACT-4            | Urine           | Vitek-2                     |   |   | R | R | R | R | R |   | R |   | S |
| <i>E. cloacae</i>    | Unkn<br>own | <0.5 | S | Negative          |  |          |         | MIR-1            | Urine           | Walkaway                    |   | R | I | R |   | R | R | S | R | S | S |
| <i>E. cloacae</i>    | 421         | <0.5 | S | Negative          |  |          |         | ACT-7            | Urine           | Vitek-2                     |   |   | R | R | R | R | R | S | R |   | S |
| <i>E. cloacae</i>    | 125         | <0.5 | S | Positive          |  |          |         | ACT-9            | Urine           | Walkaway                    |   | R | I | R | R | R | R | S | R | R | I |
| <i>E. cloacae</i>    | 113         | <0.5 | S | Not<br>Tested     |  | KPC-2    | SHV-12  | ACT-15;<br>TEM-1 | Urine           | Walkaway                    |   | R | R | R | R | R | R | S | R | S | S |
| <i>E. cloacae</i>    | 116         | <0.5 | S | Negative          |  |          |         | ACT-7            | Urine           | Reported                    | R | R |   | R | R | R | R | S | R |   | S |
| <i>E. cloacae</i>    | 116         | <0.5 | S | Negative          |  |          |         | ACT-7            | Urine           | Vitek-2                     |   |   | R | R |   | R | R | I | R | S |   |
| <i>E. cloacae</i>    | 544         | <0.5 | S | Negative          |  |          |         | ACT-16           | Urine           | Vitek-2                     |   |   | R | R |   | R | R | R | R |   | S |
| <i>E. cloacae</i>    | 68          | <0.5 | S | Negative          |  |          |         | ACT-7            | Urine           | Vitek-2                     |   |   | R | R |   |   | R | S | R | I |   |
| <i>E. coli</i>       | 457         | <0.5 | S | Negative          |  |          |         | CMY-2            | Urine           | Vitek-2                     | R | R | R | R |   | R | R | R | R | R |   |

|                      |     |      |   |               |         |          |               |                        |             |              |   |   |   |   |   |   |   |   |   |   |
|----------------------|-----|------|---|---------------|---------|----------|---------------|------------------------|-------------|--------------|---|---|---|---|---|---|---|---|---|---|
| <i>E. coli</i>       | 144 | <0.5 | S | Negative      |         |          | AmpC; TEM-1   | None                   | Urine       | Vitek-2      | R | R | R | R | S | S | S | R | R | R |
| <i>E. coli</i>       | 405 | <0.5 | S | Not Tested    | NDM-5   | CTX-M-15 | TEM-1         | Not tested             | Urine       | Vitek-2      | R | R | R | R |   | R | R | R | R | R |
| <i>E. coli</i>       | 361 | <0.5 | S | Negative      |         | CTX-M-55 | TEM-1         | None                   | Other       | Kirby-Bauer  | R |   | R | R | R | R | R | R | R | R |
| <i>E. coli</i>       | 131 | <0.5 | S | Negative      |         |          |               | Not tested             | Urine       | Walkaway     |   | R | I | R |   | R | R | R | R | S |
| <i>E. coli</i>       | 443 | <0.5 | S | Positive      | OXA-181 | CTX-M-15 |               | Not tested             | Urine       | Not Reported | R | R | R | R |   | R | R | R | R | I |
| <i>E. coli</i>       | 131 | <0.5 | S | Negative      |         | CTX-M-15 | TEM-1         | Not tested             | Urine       | Vitek-2      | R | R | I | R | S | R | R | R | R | S |
| <i>E. coli</i>       | 354 | <0.5 | S | Negative      |         |          | CMY-2; TEM-1  | Not tested             | Urine       | Vitek-2      | R | R | R | R | R | R | R | S | R | S |
| <i>E. coli</i>       | 95  | <0.5 | S | Negative      |         |          | EC            | None                   | Urine       | Walkaway     |   | R | I | S |   | S | S | S | S | R |
| <i>E. coli</i>       | 405 | <0.5 | S | Negative      |         | CTX-M-15 |               | Not tested             | Urine       | Vitek-2      | R | R | I | R | R | R | R | R | R | S |
| <i>E. coli</i>       | 38  | <0.5 | S | Indeterminate |         |          |               | Not tested             | Urine       | Vitek-2      | R | R | R | R |   | R | R | R | R | I |
| <i>E. coli</i>       | 131 | <0.5 | S | Not Tested    |         | CTX-M-15 |               | Not tested             | Urine       | Not Reported | R | R | S | R | I | R | R | R | I | S |
| <i>K. aerogenes</i>  | 93  | <0.5 | S | Negative      |         |          | AmpC          | Not tested             | Urine       | Vitek-2      |   |   | R | R | R | R | R | S | R | I |
| <i>K. aerogenes</i>  | 103 | <0.5 | S | Positive      |         |          | AmpC          | Not tested             | Urine       | Vitek-2      |   |   | R | R | R | R | R | R | R | S |
| <i>K. aerogenes</i>  | 93  | <0.5 | S | Negative      |         |          | AmpC          | Not tested             | Urine       | Vitek-2      |   |   | R | R | R | R | R | S | R | S |
| <i>K. aerogenes</i>  | 93  | <0.5 | S | Negative      |         |          | AmpC          | Not tested             | Respiratory | Vitek-2      |   |   | R | R |   | R | R | R | R | I |
| <i>K. aerogenes</i>  | 147 | <0.5 | S | Positive      |         |          | AmpC          | Not tested             | Urine       | Vitek-2      |   |   | R | R | R | R | R | S | R | S |
| <i>K. aerogenes</i>  | 93  | <0.5 | S | Negative      |         |          |               | Not tested             | Wound       | Walkaway     |   |   | R | I | R | R | R | R | S | R |
| <i>K. aerogenes</i>  | 93  | <0.5 | S | Indeterminate |         |          |               | Defective ompA         | Urine       | Kirby-Bauer  |   |   | R | R | R | R | R | R |   | R |
| <i>K. pneumoniae</i> | 15  | <0.5 | S | Negative      |         | SHV-12   | OXA-1; OXA-10 | Not tested             | Other       | Walkaway     |   |   | R | R | R |   | R | R | R | S |
| <i>K. pneumoniae</i> | 193 | <0.5 | S | Not Tested    | KPC-3   | SHV-61   | OXA-9; TEM-1  | Not tested             | Blood       | Vitek-2      | R | R | R | R |   | R | R | R | R | R |
| <i>K. pneumoniae</i> | 268 | <0.5 | S | Not Tested    | KPC-2   | SHV-1    |               | Not tested             | Urine       | Not Reported |   |   |   |   |   |   |   |   |   |   |
| <i>K. pneumoniae</i> | 458 | <0.5 | S | Negative      |         | SHV-75   |               | Defective ompA; ompK35 | Urine       | Vitek-2      | R | R | S | R | S | S | S | S | S | R |

\*For a subset of isolates tested in triplicate, we present the median and range of MICs

\*\*For a subset of isolates that had resistance to either imipenem and/or meropenem and did not have a carbapenemase gene, we tested for the presence of porin genes

\*\*\*All antimicrobial susceptibility testing besides I-R was performed at submitting clinical laboratories.
